# Supplementary material for: On the formation of biogenic secondary organic aerosol in chemical transport models: an evaluation of the WRF-CHIMERE (v2020r2) model with a focus over the Finnish boreal forest
Source: Copernicus journal article supplement (doi:10.5194/gmd-2023-64), 2023-05-24
Supplement: Supplementary file 1 [file gmd-2023-64-supplement.pdf]

Supplement

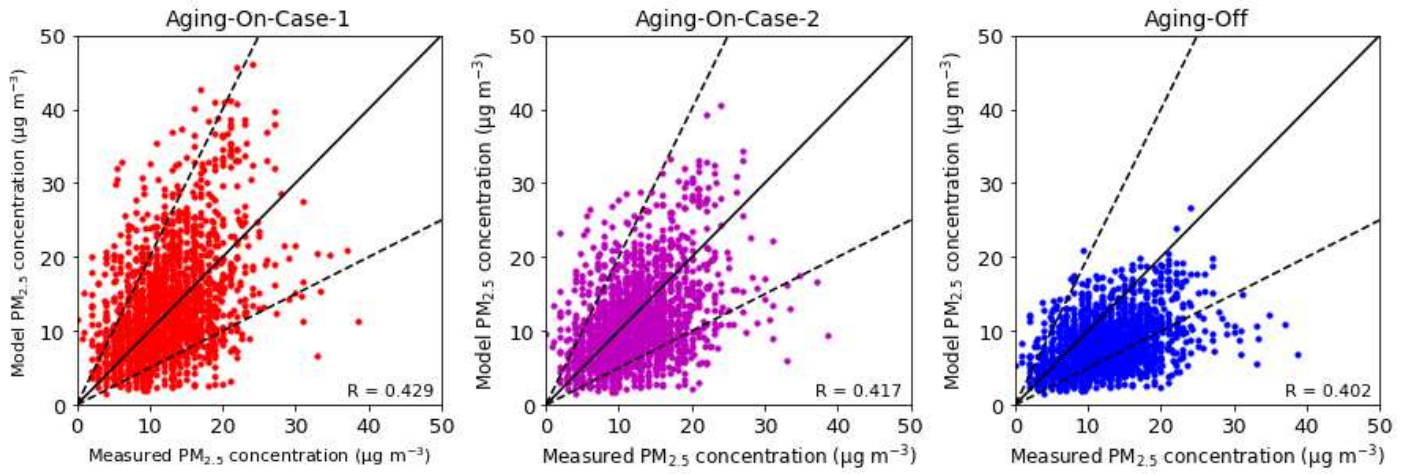

Figure S1: Daily average model (y-axis) and measured (x-axis) air concentrations of PM<sub>2.5</sub> for the Aging-On-Case-1 (left), the Aging-On-Case-2 (center) and the Aging-Off (right) BSOA schemes at the Air Quality e-Reporting (AQ e-Reporting) station (Table S1). Solid line indicates the 1:1 line. The dashed lines delimits 1:2 and 2:1 lines. Units are in μg m<sup>-3</sup>.

5

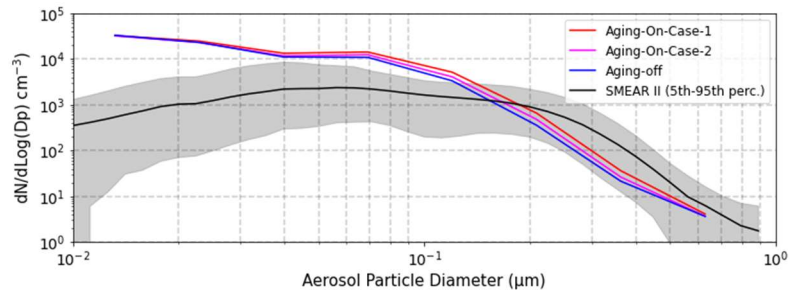

10 **Figure S2: Measured (black) and modelled (various colors) median size distribution comparison at the SMEAR-II site stations. The shaded areas indicated the 5<sup>th</sup> and 95<sup>th</sup> interquartile range.**

**Table S1: Air Quality e-Reporting (AQ e-Reporting) stations used for the additional PM<sub>2.5</sub> comparison on the coarser resolution grid (30km).**

| Site    | Latitude (deg) | Longitude (deg) | Elevation (m a.s.l.) | Country |
|---------|----------------|-----------------|----------------------|---------|
| ES0006R | 39.87          | 4.31            | 78                   | Spain   |
| ES0008R | 43.43          | -4.85           | 134                  | Spain   |
| ES0010R | 42.31          | 3.31            | 76                   | Spain   |
| ES0901A | 43.24          | -8.31           | 160                  | Spain   |
| ES1648A | 36.23          | -5.66           | 189                  | Spain   |
| ES1688A | 39.89          | -0.06           | 37                   | Spain   |
| ES1878A | 37.01          | -6.57           | 22                   | Spain   |
| ES1961A | 43.66          | -7.37           | 173                  | Spain   |
| IT0952A | 41.88          | 12.26           | 66                   | Italy   |
| IT1179A | 44.83          | 11.96           | -2                   | Italy   |
| IT1451A | 44.66          | 11.63           | 11                   | Italy   |
| IT1464A | 45.49          | 9.55            | 115                  | Italy   |
| IT1553A | 43.91          | 11.00           | 48                   | Italy   |
| IT1596A | 45.83          | 12.51           | 14                   | Italy   |
| IT1665A | 40.45          | 18.11           | 10                   | Italy   |
| IT1740A | 41.06          | 15.72           | 187                  | Italy   |
| IT1796A | 43.33          | 13.67           | 110                  | Italy   |
| IT1865A | 44.99          | 11.07           | 16                   | Italy   |
| IT1914A | 44.87          | 10.66           | 22                   | Italy   |
| IT1915A | 43.93          | 12.62           | 165                  | Italy   |
| IT1919A | 44.74          | 11.94           | 0                    | Italy   |
| IT1921A | 44.92          | 11.17           | 4                    | Italy   |
| IT1924A | 44.98          | 10.01           | 48                   | Italy   |
| IT1927A | 44.52          | 11.98           | 1                    | Italy   |
| IT2131A | 45.73          | 13.48           | 0                    | Italy   |
| IT2142A | 41.54          | 15.44           | 150                  | Italy   |
| IT2249A | 42.15          | 11.74           | 11                   | Italy   |

15 **Table S2: Model evaluation for PM<sub>2.5</sub> as predicted by the three BSOA schemes at the Air Quality e-Reporting (AQ e-Reporting) stations (from 15 June until 30 August of 2019). Statistics is performed at 1-day time resolution.**

| Variable                                 | Mean | MB   | MGE | RMSE | MFB  | MFE |
|------------------------------------------|------|------|-----|------|------|-----|
| Aging-On-Case-1 ( $\mu\text{g m}^{-3}$ ) | 13.4 | 1.1  | 5.3 | 7.0  | 0.1  | 0.4 |
| Aging-On-Case-2 ( $\mu\text{g m}^{-3}$ ) | 11.3 | -0.9 | 4.7 | 6.1  | -0.1 | 0.4 |
| Aging-Off ( $\mu\text{g m}^{-3}$ )       | 8.1  | -4.1 | 5.1 | 6.5  | -0.4 | 0.5 |
| Obs ( $\mu\text{g m}^{-3}$ )             | 12.3 | -    | -   | -    | -    | -   |
